# Supplementary material for: Development and validation of risk prediction equations to estimate survival in patients with colorectal cancer: cohort study
Source: PubMed Central journal article supplement (PMC5471851; doi:10.1136/bmj.j2497), 2017-06-15
Supplement: hipj035185.ww.pdf [file hipj035185.ww.pdf]

Supplementary table 1 comparison of predictor variables in patients with complete data compared with those with one or more missing values.

|                                               | <i>QResearch derivation cohort</i> |                         | <i>QResearch validation cohort</i> |                         |
|-----------------------------------------------|------------------------------------|-------------------------|------------------------------------|-------------------------|
|                                               | <b>complete data</b>               | <b>1+ missing value</b> | <b>complete data</b>               | <b>1+ missing value</b> |
| total patients                                | 17642                              | 26503                   | 5716                               | 9498                    |
| men                                           | 9869 (55.9)                        | 14568 (55.0)            | 3166 (55.4)                        | 5248 (55.3)             |
| <b>age in years at diagnosis</b>              |                                    |                         |                                    |                         |
| mean(SD)                                      | 71.3 (10.9)                        | 71.9 (12.9)             | 71.3 (11.1)                        | 72.0 (12.8)             |
| 15-19 years                                   | 1 (0.0)                            | 22 (0.1)                | 1 (0.0)                            | 6 (0.1)                 |
| 20-29 years                                   | 27 (0.2)                           | 105 (0.4)               | 8 (0.1)                            | 41 (0.4)                |
| 30-39 years                                   | 132 (0.7)                          | 324 (1.2)               | 53 (0.9)                           | 108 (1.1)               |
| 40-49 years                                   | 527 (3.0)                          | 1009 (3.8)              | 182 (3.2)                          | 335 (3.5)               |
| 50-59 years                                   | 1783 (10.1)                        | 2856 (10.8)             | 576 (10.1)                         | 1005 (10.6)             |
| 60-69 years                                   | 4454 (25.2)                        | 6019 (22.7)             | 1388 (24.3)                        | 2217 (23.3)             |
| 70-79 years                                   | 6439 (36.5)                        | 7986 (30.1)             | 2095 (36.7)                        | 2843 (29.9)             |
| 80-89 years                                   | 3959 (22.4)                        | 6669 (25.2)             | 1318 (23.1)                        | 2395 (25.2)             |
| 90+ years                                     | 320 (1.8)                          | 1513 (5.7)              | 95 (1.7)                           | 548 (5.8)               |
| <b>Townsend deprivation score (in fifths)</b> |                                    |                         |                                    |                         |
| most affluent                                 | 4216 (23.9)                        | 5938 (22.4)             | 1397 (24.4)                        | 2273 (23.9)             |
| 2                                             | 4304 (24.4)                        | 6083 (23.0)             | 1276 (22.3)                        | 1972 (20.8)             |
| 3                                             | 3590 (20.3)                        | 5215 (19.7)             | 1156 (20.2)                        | 1899 (20.0)             |
| 4                                             | 3056 (17.3)                        | 4739 (17.9)             | 1021 (17.9)                        | 1738 (18.3)             |
| most deprived                                 | 2476 (14.0)                        | 4528 (17.1)             | 866 (15.2)                         | 1616 (17.0)             |
| <b>Stage</b>                                  |                                    |                         |                                    |                         |
| stage recorded                                | 17642 (100.0)                      | 14595 (55.1)            | 5716 (100.0)                       | 4926 (51.9)             |
| stage 1                                       | 2673 (15.2)                        | 2120 (8.0)              | 882 (15.4)                         | 753 (7.9)               |
| stage 2                                       | 6246 (35.4)                        | 4463 (16.8)             | 2009 (35.1)                        | 1525 (16.1)             |
| stage 3                                       | 6195 (35.1)                        | 4725 (17.8)             | 2051 (35.9)                        | 1646 (17.3)             |
| stage 4                                       | 2528 (14.3)                        | 3287 (12.4)             | 774 (13.5)                         | 1002 (10.5)             |
| <b>Grade</b>                                  |                                    |                         |                                    |                         |
| grade recorded                                | 17642 (100.0)                      | 16728 (63.1)            | 5716 (100.0)                       | 5858 (61.7)             |
| well differentiated                           | 1060 (6.0)                         | 1356 (5.1)              | 332 (5.8)                          | 513 (5.4)               |
| moderately different                          | 13541 (76.8)                       | 12624 (47.6)            | 4466 (78.1)                        | 4443 (46.8)             |
| Poorly differentiate                          | 3012 (17.1)                        | 2714 (10.2)             | 911 (15.9)                         | 882 (9.3)               |
| undifferentiated                              | 29 (0.2)                           | 34 (0.1)                | 7 (0.1)                            | 20 (0.2)                |
| smoking status recorded                       | 17642 (100.0)                      | 23807 (89.8)            | 5716 (100.0)                       | 8540 (89.9)             |
| non-smoker                                    | 9065 (51.4)                        | 12466 (47.0)            | 2962 (51.8)                        | 4412 (46.5)             |
| ex-smoker                                     | 6729 (38.1)                        | 7975 (30.1)             | 2162 (37.8)                        | 2876 (30.3)             |

|                                 |               |              |              |             |
|---------------------------------|---------------|--------------|--------------|-------------|
| light smoker                    | 1131 (6.4)    | 2058 (7.8)   | 364 (6.4)    | 762 (8.0)   |
| moderate smoker                 | 438 (2.5)     | 766 (2.9)    | 131 (2.3)    | 274 (2.9)   |
| heavy smoker                    | 279 (1.6)     | 542 (2.0)    | 97 (1.7)     | 216 (2.3)   |
| <b>Missing values±</b>          |               |              |              |             |
| 1 value missing only            | 0             | 10408 (39.3) | 0            | 3604 (37.9) |
| 2 values missing only           | 0             | 9032 (34.1)  | 0            | 3233 (34.0) |
| 3 values missing only           | 0             | 3807 (14.4)  | 0            | 1426 (15.0) |
| 4 values missing only           | 0             | 2312 (8.7)   | 0            | 870 (9.2)   |
| 5 values missing only           | 0             | 652 (2.5)    | 0            | 254 (2.7)   |
| 6 values missing                | 0             | 292 (1.1)    | 0            | 111 (1.2)   |
| not recorded                    | 0             | 7166 (27.0)  | 0            | 2562 (27.0) |
| < 20                            | 610 (3.5)     | 928 (3.5)    | 200 (3.5)    | 356 (3.7)   |
| 20 to 24.9                      | 5358 (30.4)   | 6659 (25.1)  | 1769 (30.9)  | 2395 (25.2) |
| 25-29.9                         | 7275 (41.2)   | 7667 (28.9)  | 2342 (41.0)  | 2662 (28.0) |
| 30-34.9                         | 3255 (18.5)   | 3046 (11.5)  | 1026 (17.9)  | 1134 (11.9) |
| 35+                             | 1144 (6.5)    | 1037 (3.9)   | 379 (6.6)    | 389 (4.1)   |
| <b>cancer treatments</b>        |               |              |              |             |
| surgery                         | 15938 (90.3)  | 17330 (65.4) | 5192 (90.8)  | 6055 (63.8) |
| chemotherapy                    | 6368 (36.1)   | 7199 (27.2)  | 1977 (34.6)  | 2537 (26.7) |
| <b>Medical history</b>          |               |              |              |             |
| family history of bowel cancer  | 467 (2.6)     | 528 (2.0)    | 154 (2.7)    | 191 (2.0)   |
| cardiovascular disease          | 3855 (21.9)   | 4900 (18.5)  | 1281 (22.4)  | 1770 (18.6) |
| type 1 diabetes                 | 47 (0.3)      | 50 (0.2)     | 17 (0.3)     | 23 (0.2)    |
| type 2 diabetes                 | 2990 (16.9)   | 2834 (10.7)  | 966 (16.9)   | 1036 (10.9) |
| chronic renal disease           | 242 (1.4)     | 367 (1.4)    | 65 (1.1)     | 137 (1.4)   |
| flag                            | 1168 (6.6)    | 1797 (6.8)   | 416 (7.3)    | 655 (6.9)   |
| prescribed statins at diagnosis | 6453 (36.6)   | 5051 (19.1)  | 2043 (35.7)  | 1809 (19.0) |
| prescribed aspirin at diagnosis | 4482 (25.4)   | 4853 (18.3)  | 1495 (26.2)  | 1807 (19.0) |
| BMI recorded                    | 17642 (100.0) | 19337 (73.0) | 5716 (100.0) | 6936 (73.0) |
| platelets recorded              | 17642 (100.0) | 16041 (60.5) | 5716 (100.0) | 5774 (60.8) |
| LFTs recorded                   | 17642 (100.0) | 14357 (54.2) | 5716 (100.0) | 5190 (54.6) |
| raised platelets                | 1885 (10.7)   | 2043 (7.7)   | 565 (9.9)    | 787 (8.3)   |
| raised LFTs                     | 814 (4.6)     | 1071 (4.0)   | 262 (4.6)    | 368 (3.9)   |

± missing values for 6 variables in the final prediction models – stage, grade, smoking status  
body mass index, LFTs, platelets

Supplementary Table 2: characteristics of men and women in the derivation cohort with and without a family history of bowel cancer.

|                            | <i>women</i> | <i>women</i> | <i>men</i>   | <i>men</i>  |
|----------------------------|--------------|--------------|--------------|-------------|
|                            | <b>no FH</b> | <b>FH</b>    | <b>no FH</b> | <b>FH</b>   |
| Total cases                | 19194        | 514          | 23956        | 481         |
| Mean age at diagnosis (SD) | 72.6 (12.8)  | 68.2 (12.7)  | 71.0 (11.5)  | 66.3 (12.1) |
| colon cancer               | 13282 (69.2) | 359 (69.8)   | 14275 (59.6) | 304 (63.2)  |
| rectal cancer              | 4618 (24.1)  | 117 (22.8)   | 7802 (32.6)  | 137 (28.5)  |
| recto-sigmoid              | 1294 (6.7)   | 38 (7.4)     | 1879 (7.8)   | 40 (8.3)    |
| most affluent              | 4342 (22.6)  | 163 (31.7)   | 5517 (23.0)  | 132 (27.4)  |
| 2                          | 4492 (23.4)  | 120 (23.3)   | 5649 (23.6)  | 126 (26.2)  |
| 3                          | 3868 (20.2)  | 100 (19.5)   | 4756 (19.9)  | 81 (16.8)   |
| 4                          | 3495 (18.2)  | 64 (12.5)    | 4168 (17.4)  | 68 (14.1)   |
| most deprived              | 2997 (15.6)  | 67 (13.0)    | 3866 (16.1)  | 74 (15.4)   |
| stage recorded             | 13787 (71.8) | 406 (79.0)   | 17670 (73.8) | 374 (77.8)  |
| stage 1                    | 1947 (10.1)  | 83 (16.1)    | 2697 (11.3)  | 66 (13.7)   |
| stage 2                    | 4791 (25.0)  | 135 (26.3)   | 5669 (23.7)  | 114 (23.7)  |
| stage 3                    | 4582 (23.9)  | 133 (25.9)   | 6075 (25.4)  | 130 (27.0)  |
| stage 4                    | 2467 (12.9)  | 55 (10.7)    | 3229 (13.5)  | 64 (13.3)   |
| grade recorded             | 14645 (76.3) | 432 (84.0)   | 18907 (78.9) | 386 (80.2)  |
| well differentiated        | 1075 (5.6)   | 35 (6.8)     | 1277 (5.3)   | 29 (6.0)    |
| moderately different       | 10841 (56.5) | 321 (62.5)   | 14712 (61.4) | 291 (60.5)  |
| Poorly differentiate       | 2701 (14.1)  | 76 (14.8)    | 2883 (12.0)  | 66 (13.7)   |
| undifferentiated           | 28 (0.1)     | 0 (0.0)      | 35 (0.1)     | 0 (0.0)     |
| surgery                    | 14300 (74.5) | 429 (83.5)   | 18164 (75.8) | 375 (78.0)  |
| chemotherapy               | 5331 (27.8)  | 173 (33.7)   | 7865 (32.8)  | 198 (41.2)  |
| radiotherapy               | 2271 (11.8)  | 54 (10.5)    | 4037 (16.9)  | 79 (16.4)   |
| smoking status recorded    | 17905 (93.3) | 500 (97.3)   | 22571 (94.2) | 473 (98.3)  |
| Non-smoker                 | 11122 (57.9) | 294 (57.2)   | 9921 (41.4)  | 194 (40.3)  |
| Ex-smoker                  | 4762 (24.8)  | 136 (26.5)   | 9591 (40.0)  | 215 (44.7)  |
| light smoker               | 1154 (6.0)   | 41 (8.0)     | 1955 (8.2)   | 39 (8.1)    |
| moderate smoker            | 572 (3.0)    | 12 (2.3)     | 608 (2.5)    | 12 (2.5)    |
| heavy smoker               | 295 (1.5)    | 17 (3.3)     | 496 (2.1)    | 13 (2.7)    |
| Medical history            |              |              |              |             |
| other cancer               | 1518 (7.9)   | 52 (10.1)    | 1876 (7.8)   | 36 (7.5)    |
| cardiovascular disease     | 2990 (15.6)  | 64 (12.5)    | 5612 (23.4)  | 89 (18.5)   |
| type 1 diabetes            | 28 (0.1)     | 1 (0.2)      | 67 (0.3)     | 1 (0.2)     |
| type 2 diabetes            | 2166 (11.3)  | 41 (8.0)     | 3552 (14.8)  | 65 (13.5)   |

|                              |              |            |              |            |
|------------------------------|--------------|------------|--------------|------------|
| chronic renal disease        | 263 (1.4)    | 3 (0.6)    | 339 (1.4)    | 4 (0.8)    |
| chronic liver disease        | 139 (0.7)    | 4 (0.8)    | 232 (1.0)    | 10 (2.1)   |
| inflammatory bowel disease   | 294 (1.5)    | 7 (1.4)    | 359 (1.5)    | 7 (1.5)    |
| COPD                         | 1007 (5.2)   | 28 (5.4)   | 1902 (7.9)   | 28 (5.8)   |
| venous thromboembolism       | 886 (4.6)    | 15 (2.9)   | 925 (3.9)    | 14 (2.9)   |
| statins at diagnosis         | 4132 (21.5)  | 126 (24.5) | 7097 (29.6)  | 149 (31.0) |
| aspirin at diagnosis         | 3253 (16.9)  | 96 (18.7)  | 5882 (24.6)  | 104 (21.6) |
| Haemoglobin recorded         | 14915 (77.7) | 424 (82.5) | 18114 (75.6) | 376 (78.2) |
| platelets recorded           | 14855 (77.4) | 425 (82.7) | 18029 (75.3) | 374 (77.8) |
| HB < 11 g/DL                 | 5464 (28.5)  | 117 (22.8) | 4871 (20.3)  | 83 (17.3)  |
| raised platelets             | 2266 (11.8)  | 55 (10.7)  | 1572 (6.6)   | 35 (7.3)   |
| raised LFTs                  | 682 (3.6)    | 15 (2.9)   | 1169 (4.9)   | 19 (4.0)   |
| BMI recorded                 | 15899 (82.8) | 469 (91.2) | 20172 (84.2) | 439 (91.3) |
| < 20 kg/m <sup>2</sup>       | 1004 (5.2)   | 25 (4.9)   | 500 (2.1)    | 9 (1.9)    |
| 20 to 24.9 kg/m <sup>2</sup> | 5692 (29.7)  | 167 (32.5) | 6046 (25.2)  | 112 (23.3) |
| 25-29.9 kg/m <sup>2</sup>    | 5504 (28.7)  | 170 (33.1) | 9061 (37.8)  | 207 (43.0) |
| 30-34.9 kg/m <sup>2</sup>    | 2600 (13.5)  | 65 (12.6)  | 3548 (14.8)  | 88 (18.3)  |
| 35+ kg/m <sup>2</sup>        | 1099 (5.7)   | 42 (8.2)   | 1017 (4.2)   | 23 (4.8)   |

Supplementary Table 3 Adjusted hazard ratios with 95% confidence intervals for colorectal cancer death in men and women in the derivation cohort for the main model restricted to those surviving the first year (landmark analysis). For fractional polynomial terms see footnotes and figure 1.

|                                       | <i>Adjusted hazard ratio (95% CI)</i> | <i>Adjusted hazard ratio (95% CI)</i> |
|---------------------------------------|---------------------------------------|---------------------------------------|
|                                       | <b>women</b>                          | <b>men</b>                            |
| Townsend Score <sup>§</sup>           | 1.10 (1.05 to 1.15)                   | 1.10 (1.06 to 1.15)                   |
| <b>Smoking status</b>                 |                                       |                                       |
| non-smoker                            | 1.00                                  | 1.00                                  |
| ex-smoker                             | 0.98 (0.92 to 1.05)                   | 1.04 (0.98 to 1.10)                   |
| light smoker                          | 1.32 (1.17 to 1.50)                   | 1.41 (1.27 to 1.57)                   |
| moderate smoker                       | 1.37 (1.18 to 1.60)                   | 1.54 (1.33 to 1.78)                   |
| heavy smoker                          | 1.49 (1.15 to 1.91)                   | 1.72 (1.45 to 2.04)                   |
| <b>Stage at diagnosis<sup>‡</sup></b> |                                       |                                       |
| stage 1                               | 1.00                                  | 1.00                                  |
| stage 2                               | 1.32 (1.16 to 1.50)                   | 1.25 (1.13 to 1.39)                   |
| stage 3                               | 2.70 (2.35 to 3.09)                   | 2.35 (2.07 to 2.68)                   |
| stage 4                               | 7.32 (5.78 to 9.29)                   | 7.24 (6.15 to 8.53)                   |
| <b>Grade at diagnosis</b>             |                                       |                                       |
| grade 1- well differentiated          | 1.00                                  | 1.00                                  |
| grade 2- moderately differentiated    | 0.97 (0.86 to 1.11)                   | 1.05 (0.95 to 1.15)                   |
| grade 3- poorly differentiated        | 1.05 (0.91 to 1.22)                   | 1.29 (1.16 to 1.45)                   |
| grade 4- undifferentiated             | 0.75 (0.34 to 1.61)                   | 1.14 (0.33 to 3.93)                   |
| <b>Medical history</b>                |                                       |                                       |
| FH of bowel cancer <sup>†</sup>       | 0.67 (0.56 to 0.80)                   | 0.88 (0.74 to 1.04)                   |
| raised platelets <sup>†</sup>         | 1.09 (0.99 to 1.20)                   | 1.20 (1.08 to 1.32)                   |
| raised LFTs <sup>†</sup>              | 1.34 (1.09 to 1.66)                   | 1.67 (1.46 to 1.90)                   |
| statins at diagnosis <sup>†</sup>     | 0.84 (0.78 to 0.91)                   | 0.79 (0.75 to 0.84)                   |
| aspirin at diagnosis <sup>†</sup>     | 0.95 (0.85 to 1.05)                   | 0.92 (0.86 to 0.97)                   |
| CVD <sup>†</sup>                      | 1.36 (1.26 to 1.47)                   | 1.35 (1.26 to 1.44)                   |
| type 1 diabetes <sup>†</sup>          | 1.63 (0.99 to 2.67)                   | 1.46 (0.84 to 2.54)                   |
| type 2 diabetes <sup>†</sup>          | 1.20 (1.10 to 1.32)                   | 1.19 (1.11 to 1.28)                   |
| <b>Cancer treatments</b>              |                                       |                                       |
| surgery <sup>†</sup>                  | 0.65 (0.59 to 0.71)                   | 0.62 (0.56 to 0.67)                   |
| Chemotherapy (stage 1) <sup>†</sup>   | 1.97 (1.40 to 2.75)                   | 1.71 (1.34 to 2.16)                   |
| Chemotherapy (stage 2) <sup>†</sup>   | 1.57 (1.36 to 1.81)                   | 1.49 (1.13 to 1.67)                   |
| Chemotherapy (stage3) <sup>†</sup>    | 1.05 (0.96 to 1.17)                   | 1.08 (0.98 to 1.18)                   |
| Chemotherapy (stage4) <sup>†</sup>    | 1.38 (1.13 to 1.70)                   | 1.16 (1.00 to 1.34)                   |

Notes <sup>§</sup> the Townsend score ranges between -7 (most affluent) and +11 (most deprived). Adjusted hazard ratio is per 5-unit increase. <sup>‡</sup> in people without chemotherapy

<sup>†</sup>Adjusted hazard ratio compared with patients without this characteristic. The model for women includes terms of age (2 FP terms 3 3) and body mass index (2 FP terms -2 0). The model for men includes terms of for

age (2 FP terms 3 3) and body mass index (2 FP terms .5 1). There were interactions in men and women between age and stage and an interaction between age and aspirin in women

Supplementary Table 4 Performance of the equations in men and women for (a) all-cause mortality and (b) colorectal cancer mortality in QResearch validation cohort and PHE cancer registry validation cohort at 1 and 10-year follow-up

| <i>outcome</i>       | <i>statistic</i> | <i>years</i> | <i>QResearch cohort</i>   | <i>PHE cohort</i>         |
|----------------------|------------------|--------------|---------------------------|---------------------------|
| <b>women</b>         |                  |              |                           |                           |
| All-cause mortality  | D statistic      | 1            | 2.027 (1.929 to 2.126)    | 1.964 (1.933 to 1.995)    |
|                      | R <sup>2</sup>   | 1            | 49.52 (47.096 to 51.945)  | 47.935 (47.148 to 48.722) |
|                      | Harrell's C      | 1            | 0.814 (0.805 to 0.824)    | 0.807 (0.804 to 0.809)    |
|                      | D statistic      | 10           | 1.525 (1.453 to 1.597)    | 1.342 (1.327 to 1.357)    |
|                      | R <sup>2</sup>   | 10           | 35.696 (33.523 to 37.87)  | 30.062 (29.599 to 30.526) |
|                      | Harrell's C      | 10           | 0.773 (0.766 to 0.78)     | 0.754 (0.753 to 0.756)    |
| colorectal mortality | D statistic      | 1            | 2.096 (1.961 to 2.23)     | n/a                       |
|                      | R <sup>2</sup>   | 1            | 51.173 (47.987 to 54.359) | n/a                       |
|                      | Harrell's C      | 1            | 0.823 (0.809 to 0.836)    | n/a                       |
|                      | D statistic      | 10           | 1.8 (1.702 to 1.898)      | n/a                       |
|                      | R <sup>2</sup>   | 10           | 43.607 (40.936 to 46.278) | n/a                       |
|                      | Harrell's C      | 10           | 0.793 (0.78 to 0.806)     | n/a                       |
| <b>men</b>           |                  |              |                           |                           |
| All-cause mortality  | D statistic      | 1            | 2.062 (1.907 to 2.217)    | 1.939 (1.921 to 1.958)    |
|                      | R <sup>2</sup>   | 1            | 50.353 (46.601 to 54.104) | 47.309 (46.841 to 47.777) |
|                      | Harrell's C      | 1            | 0.814 (0.802 to 0.826)    | 0.795 (0.793 to 0.797)    |
|                      | D statistic      | 10           | 1.465 (1.405 to 1.525)    | 1.304 (1.293 to 1.315)    |
|                      | R <sup>2</sup>   | 10           | 33.878 (32.055 to 35.701) | 28.875 (28.525 to 29.224) |
|                      | Harrell's C      | 10           | 0.766 (0.758 to 0.774)    | 0.744 (0.742 to 0.745)    |
| colorectal mortality | D statistic      | 1            | 2.192 (2.063 to 2.322)    | n/a                       |
|                      | R <sup>2</sup>   | 1            | 53.428 (50.489 to 56.368) | n/a                       |
|                      | Harrell's C      | 1            | 0.833 (0.821 to 0.845)    | n/a                       |
|                      | D statistic      | 10           | 1.798 (1.711 to 1.884)    | n/a                       |
|                      | R <sup>2</sup>   | 10           | 43.548 (41.192 to 45.904) | n/a                       |
|                      | Harrell's C      | 10           | 0.793 (0.784 to 0.802)    | n/a                       |
